# Supplementary material for: Drug-internalized bacterial swimmers for magnetically manipulable tumor-targeted drug delivery
Source: Royal Society of Chemistry journal article supplement (doi:10.1039/d0nr01892a), 2020-01-01
Supplement: d0nr01892a1.pdf [file d0nr01892a1.pdf]

## Supporting information

# Drug-Internalized Bacteria Swimmers for Magnetically Manipulable Tumor-Targeted Drug Delivery

Zhichu Xiang,<sup>1,6#</sup> Gexuan Jiang,<sup>1,2,3#</sup> Di Fan,<sup>1,2,3</sup> Jiesheng Tian,<sup>7</sup> Zhiyuan Hu,<sup>3,4\*</sup> Qiaojun Fang<sup>1,2,3,4,5\*</sup>

<sup>1</sup>CAS Key Laboratory for Biomedical Effects of Nanomaterials & Nanosafety, CAS Center for Excellence in Nanoscience, National Center for Nanoscience and Technology, Beijing 100190, China;

<sup>2</sup>Laboratory of Theoretical and Computational Nanoscience, National Center for Nanoscience and Technology, Beijing 100190, China;

<sup>3</sup>University of Chinese Academy of Sciences, Beijing 100049, China;

<sup>4</sup>Sino-Danish Center for Education and Research, Beijing 101408, China;

<sup>5</sup>Beijing Key Laboratory of Ambient Particles Health Effects and Prevention Techniques, National Center for Nanoscience and Technology, Beijing 100190, China

<sup>6</sup>Key Laboratory of Optoelectronic Devices and Systems of Ministry of Education and Guangdong Province, College of Optoelectronic Engineering, Shenzhen University, Shenzhen, 518060, P. R. China.

<sup>7</sup>State Key Laboratories for Agro-biotechnology and College of Biological Sciences, China Agricultural University, Beijing 100193, China.

[#] These authors contributed equally to this work.

\*Corresponding authors:

Zhiyuan Hu, National Center for Nanoscience and Technology, Beijing 100190, China.

Phone: +86-10-82545643; Fax: +86-10-82545643; E-mail: huzy@nanoctr.cn.

Qiaojun Fang, National Center for Nanoscience and Technology, Beijing 100190, China.

Phone: +86-10-82545562; Fax: +86-10-82545643; E-mail: fangqj@nanoctr.cn.

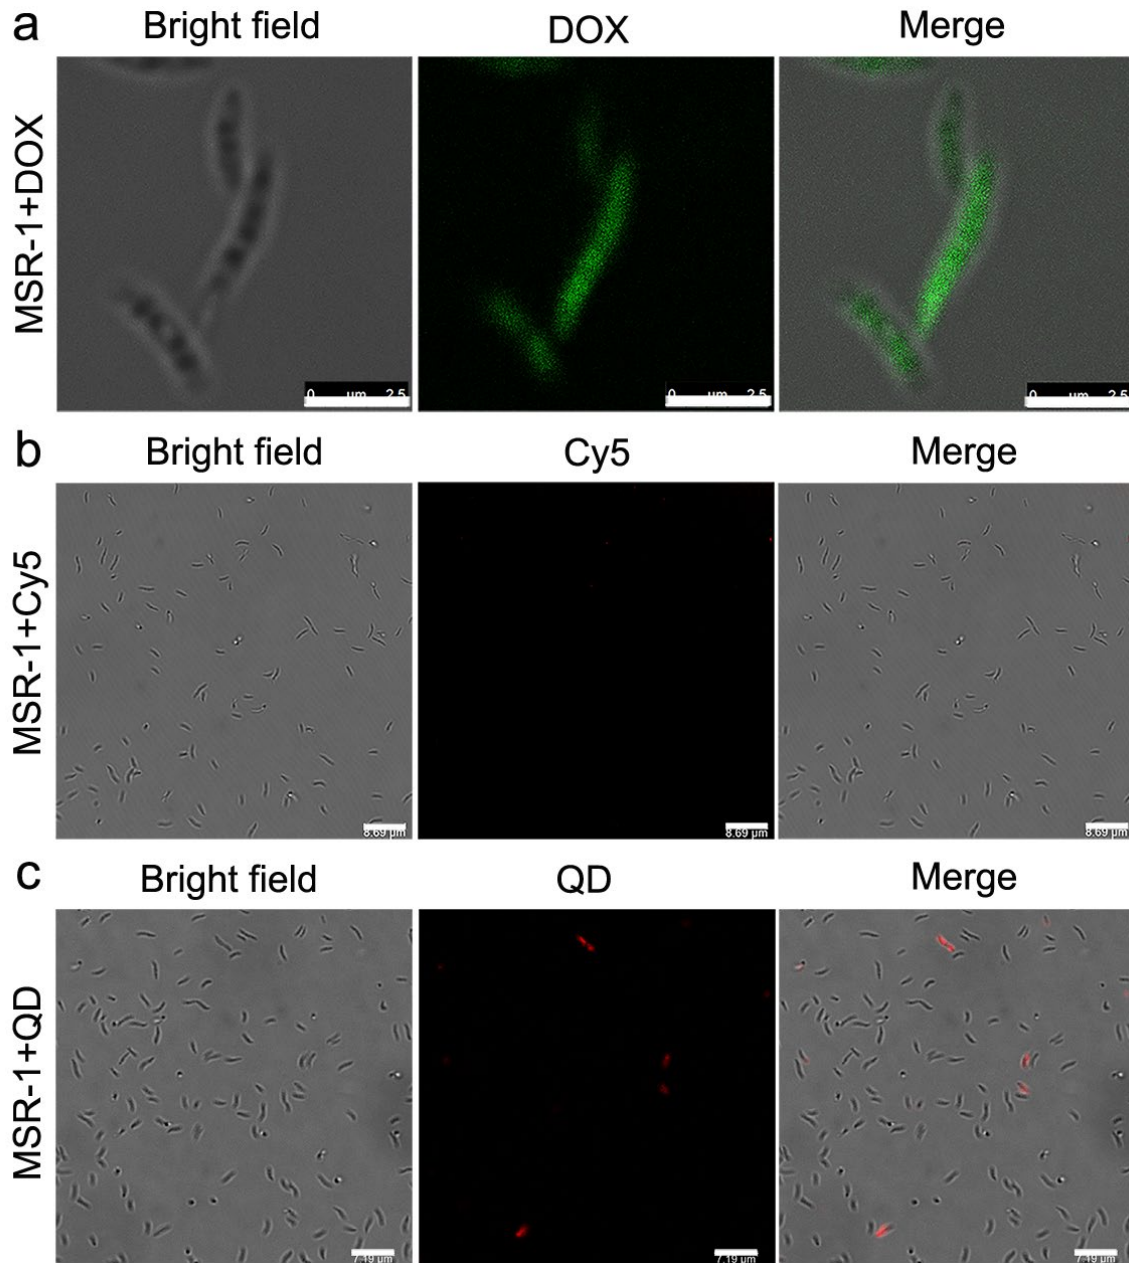

**Figure S1.** Confocal fluorescence images of MSR-1 incubated with (a) DOX (green), (b) Cy5 (red), and (c) QD (red) for 2 h. Compared with DOX, both Cy5 and QD did not internalize into MSR-1 bacteria efficiently. Scale bars: 2.5  $\mu\text{m}$  (a), 8.69  $\mu\text{m}$  (b), 7.19  $\mu\text{m}$  (c).

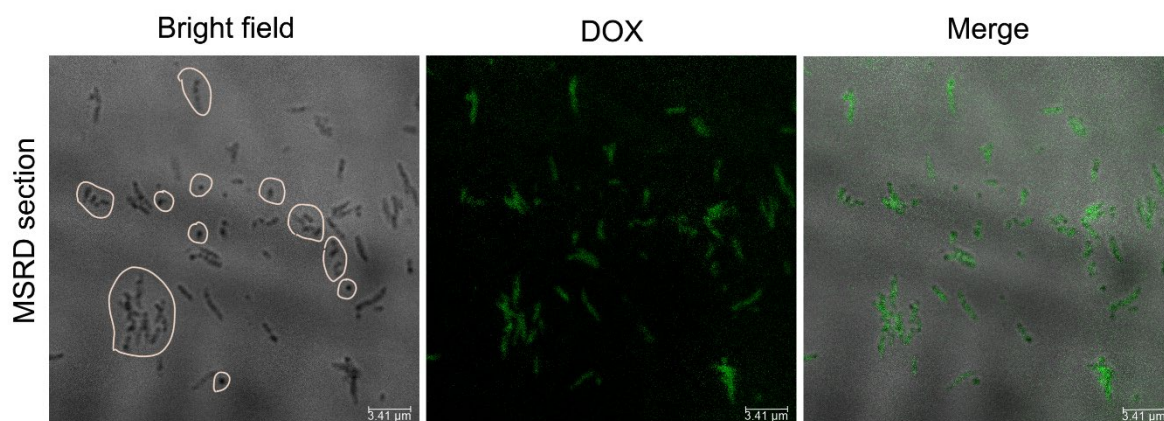

**Figure S2.** The confocal fluorescence images of sections of MSR-1 bacteria. In the bright field, the white circles indicate the cross sections of MSR-1 bacteria.

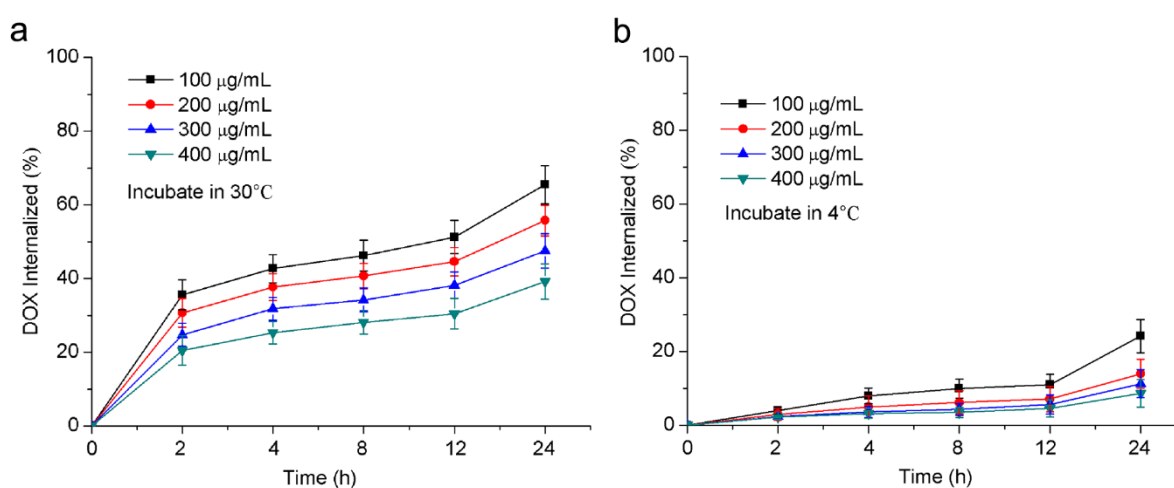

**Figure S3.** The DOX internalization profiles of MSR-1 bacteria with different amounts of DOX added. The bacteria were incubated with DOX at (a) 30 °C and (b) 4 °C, respectively. Data are represented as means  $\pm$  SD (n=3).



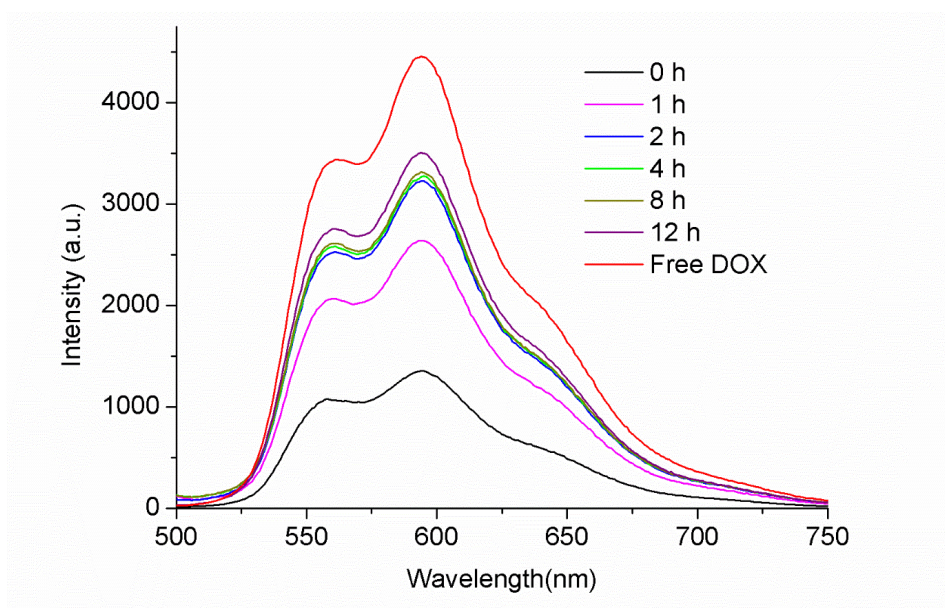

**Figure S4.** Fluorescence spectra of MSRDS and released DOX after being incubated in PBS (10% FBS) for different time spans. The excitation wavelength was 480 nm and the emission was collected between 500 and 750 nm. Free DOX (86  $\mu$ M) is served as a positive control.

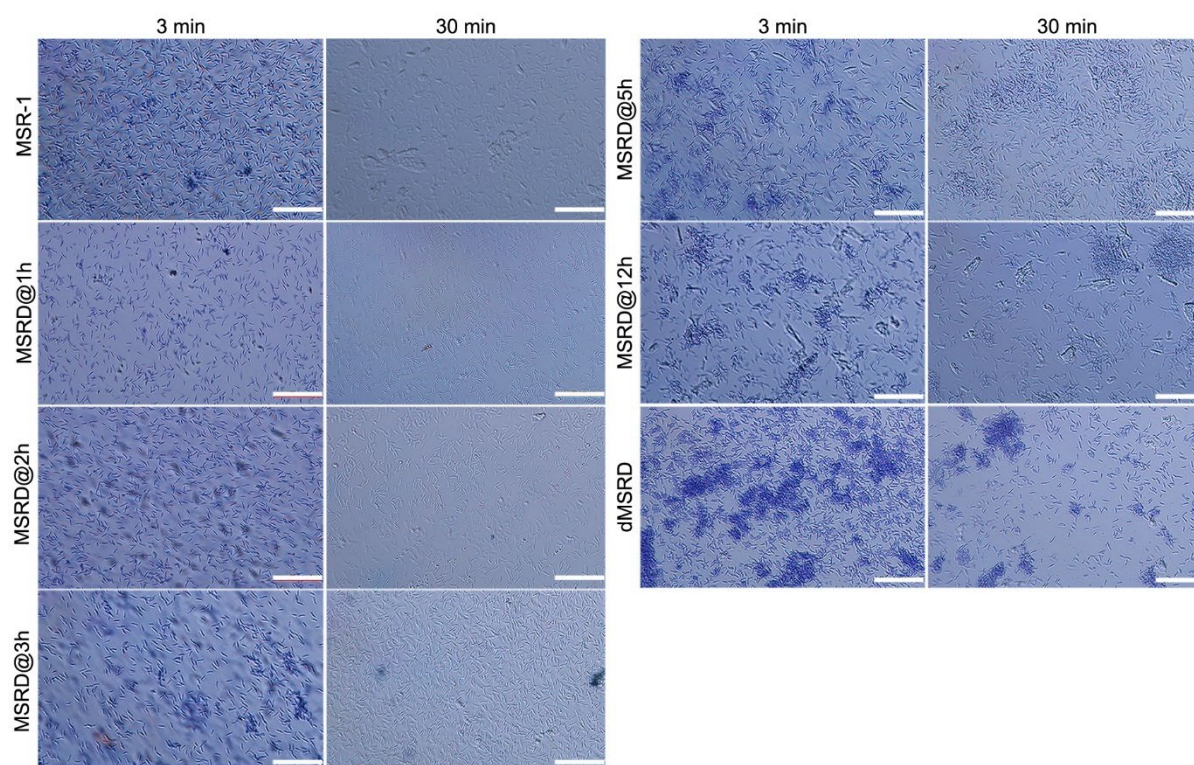

**Figure S5.** Methylene blue removal analysis of MSRDS incubated with DOX (0.1 mg/mL) over spans of 1 h, 2 h, 3 h, 5 h and 12 h. Corresponding images of methylene blue-treated cells at 3 min and 30 min after the treatments were collected. Free MSR-1 and dMSRD bacteria were used as controls. Scale bars: 20  $\mu$ m.

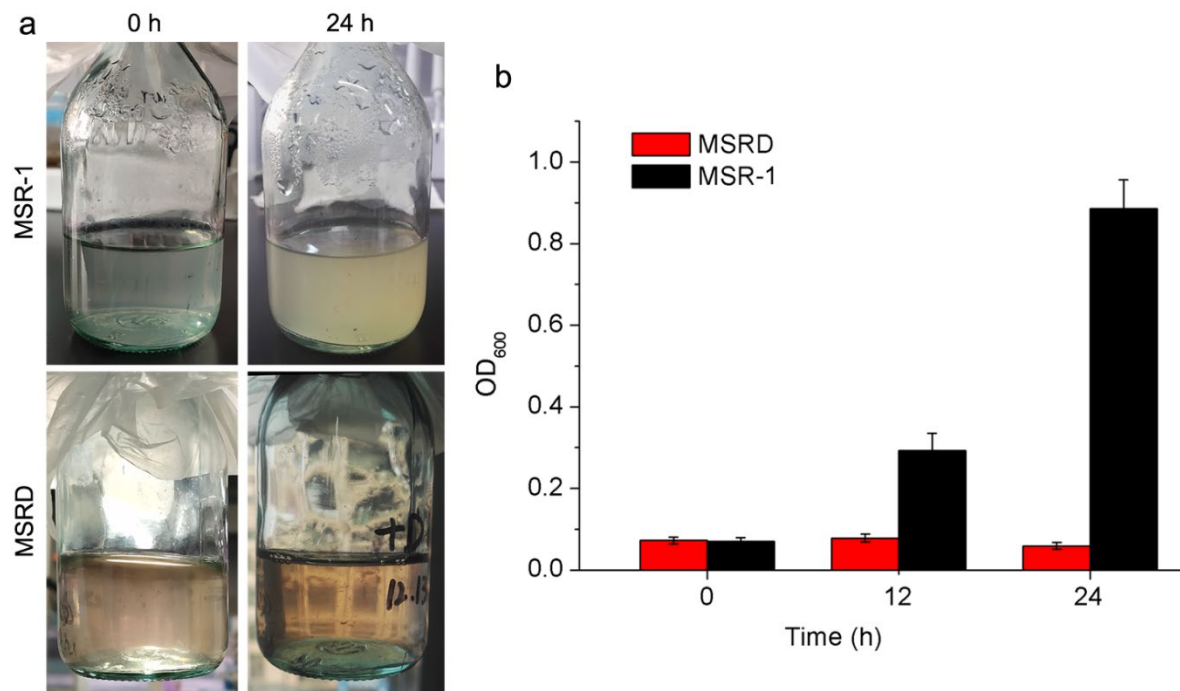

**Figure S6.** The proliferation of MSR-1 and MSRD bacteria cultured in LAY medium (100 rpm, 30 °C). (a) Representative images of MSR-1 and MSRD before and after cultivation for 24 h (left). (b) OD<sub>600</sub> values of MSR-1 and MSRD cells cultured over spans of 0 h, 12 h, 24 h. Data are represented as means  $\pm$  SD (n=3).

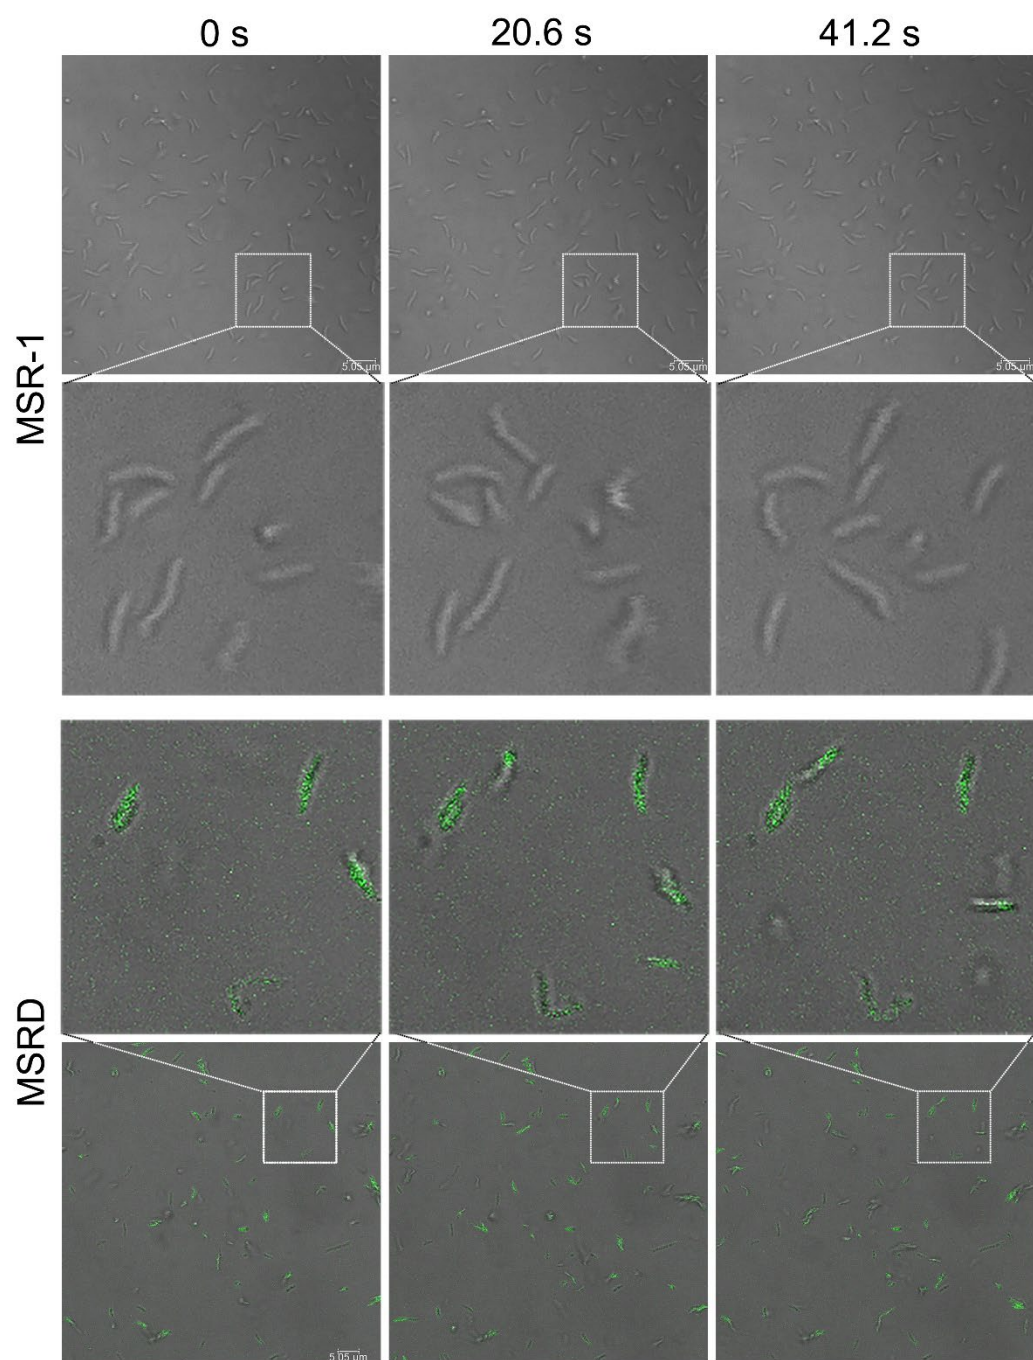

Figure S7. The enlarged MSR-1 and MSRD bacteria to show the motility of MSRD bacteria swimmers.



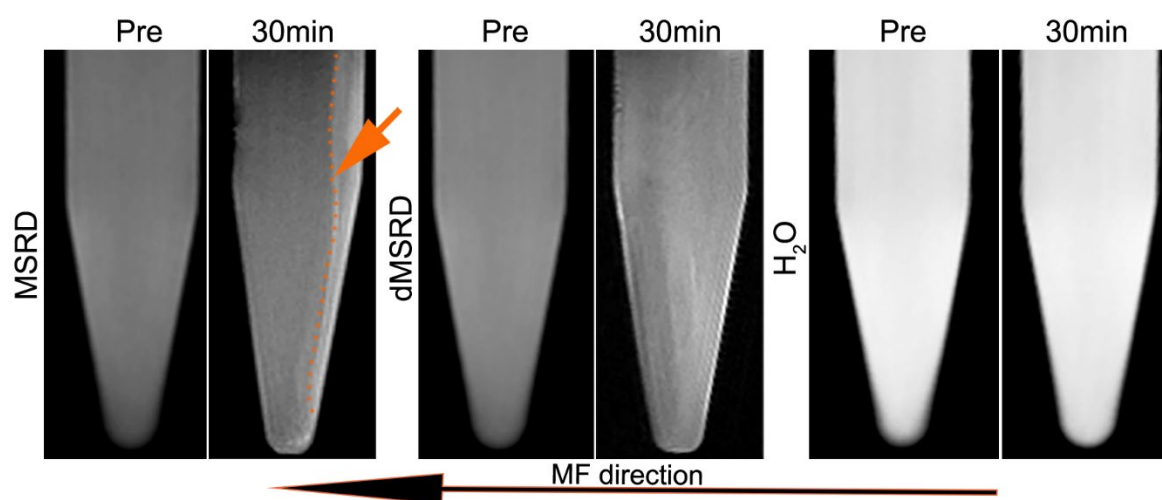

**Figure S8.** MRI images of MSR and dMSR swimmers after exposed to directional MF for 30 min. The orange arrow in MSR group indicates the boundary of bacteria and solution due to the directional movement of bacteria swimmers under external MF.

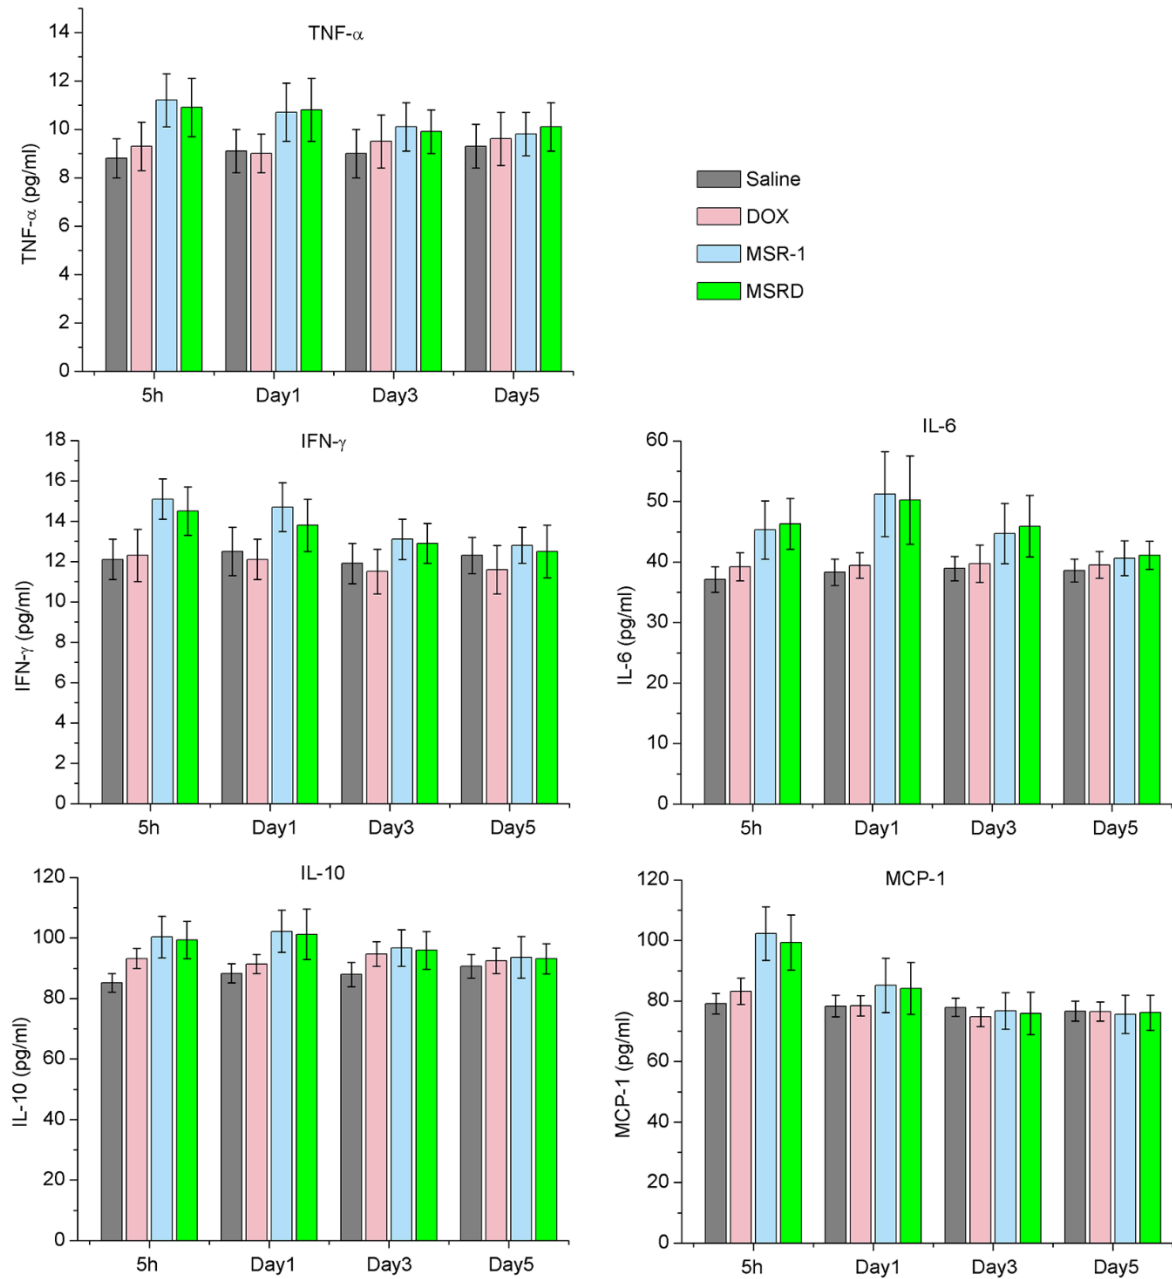

**Figure S9.** Inflammatory cytokine secretion analysis of mice in different groups. Mice were randomly divided and administered with saline, DOX, MSR-1, and MSR-D, respectively. The blood was sampled at 5 h, day 1, day 3, day 5 post injections, and the cytokine levels were analyzed using a BD Mouse Inflammation Kit. Data are represented as means  $\pm$  SD (n=3).



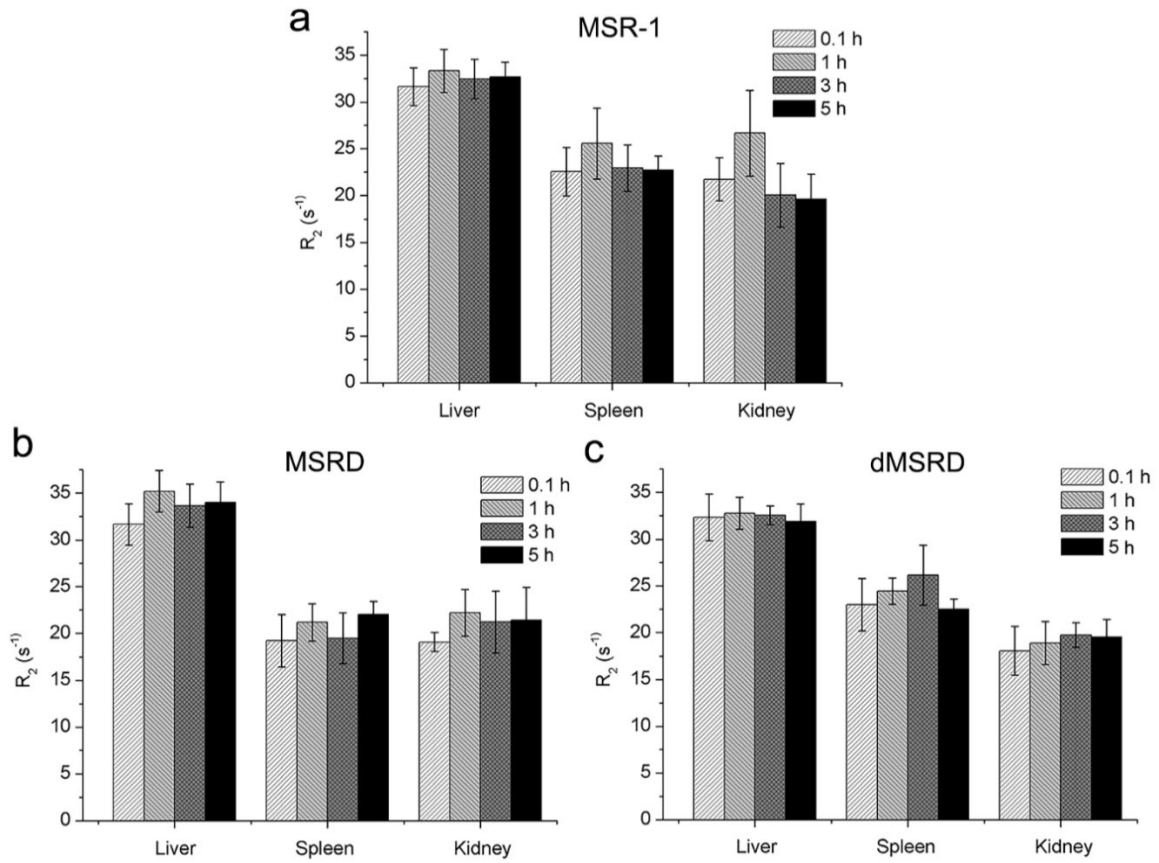

**Figure S10.** Transverse relaxation rate ( $R_2$ ) of main organs from the mice bearing PC-3 tumors at 0.1 h, 1 h, 3 h, 5 h after exposure to directional MF. The mice in each group were treated with (a) MSR-1, (b) MSR-D, and (c) dMSRD. Data are represented as means  $\pm$  SD ( $n=3$ ).

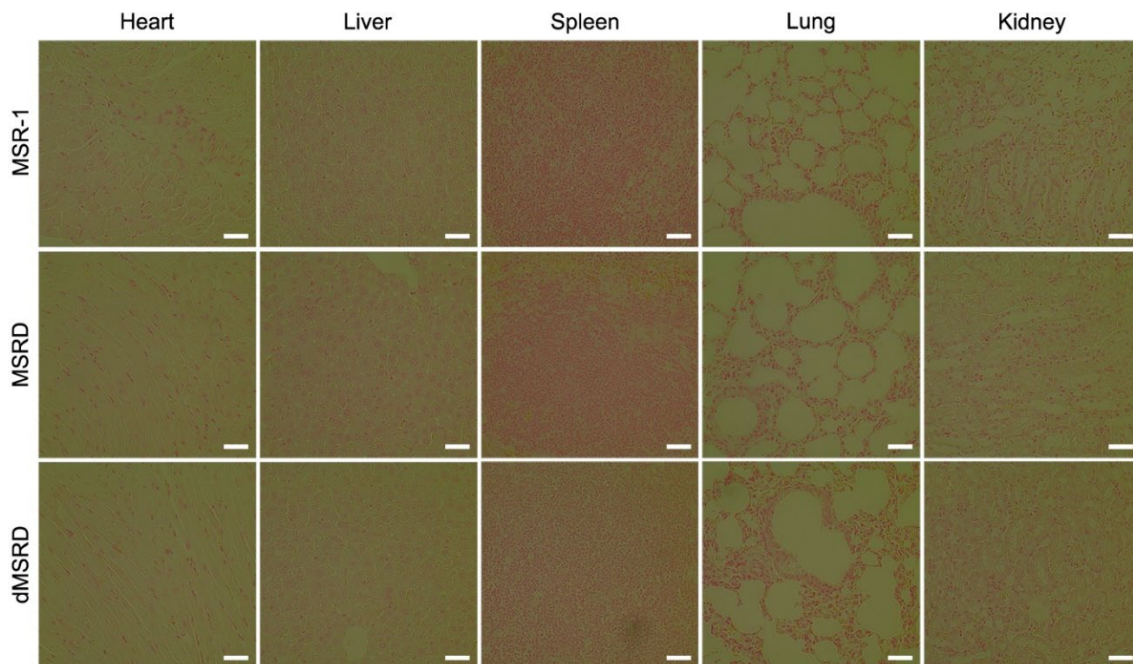

**Figure S11.** Representative images of Prussian blue stained organ slices from the mice 7 h after exposure to the directional MF. Scale bars: 100  $\mu\text{m}$ .

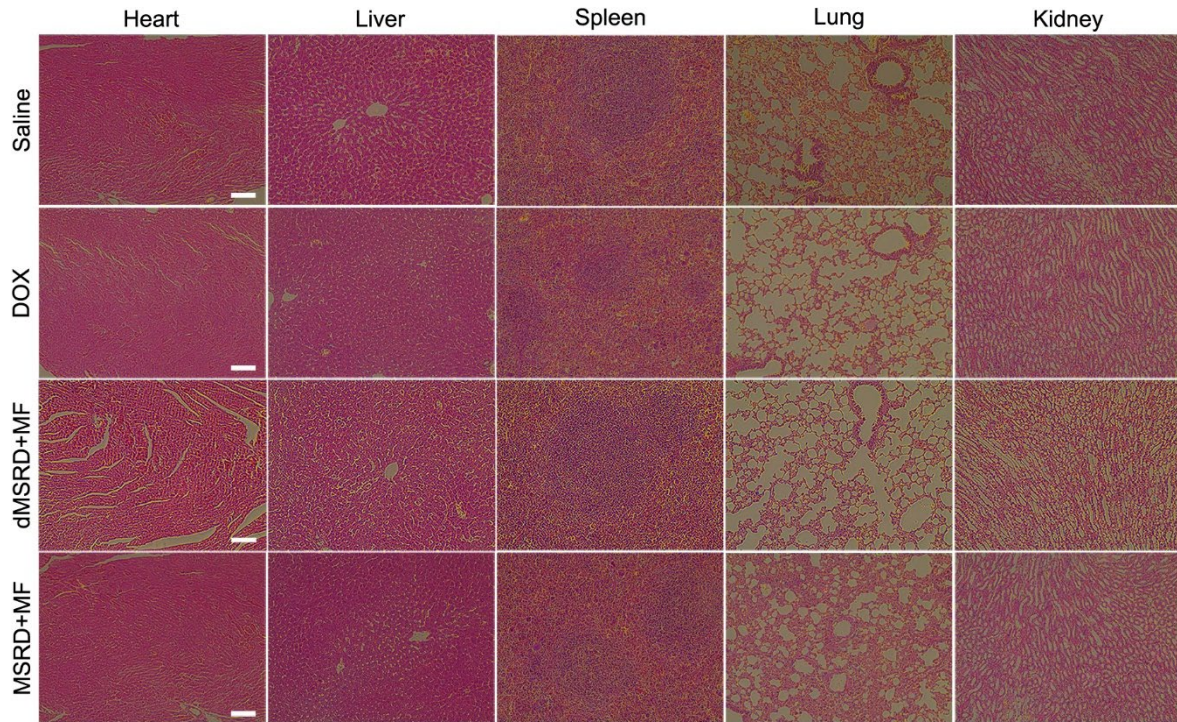

**Figure S12.** Representative H&E images of main organs from the mice treated with Saline, DOX dMSRD+MF, and MSRD+MF, respectively. Scale bars: 100  $\mu$ m.

Abbreviations: **MF:** magnetic field, **MRI:** magnetic resonance imaging, **MTB:** Magnetotactic bacteria, **MSR-1:** *Magnetospirillum gryphiswaldense*, **MSRDs:** DOX-internalized MSR-1 bacteria swimmers, **dMSRDs:** dead MSRD cells, **FBS:** Fetal Bovine Serum, **MCTS:** multicellular tumor spheroids.
